# Supplementary material for: Genetically enhancing the expression of chemokine domain of CX3CL1 fails to prevent tau pathology in mouse models of tauopathy
Source: Springer Nature journal article supplement (doi:10.1186/s12974-018-1310-6), 2018-09-25
Supplement: MOESM1 [file 16150742]

## Additional file 1: Figure S1

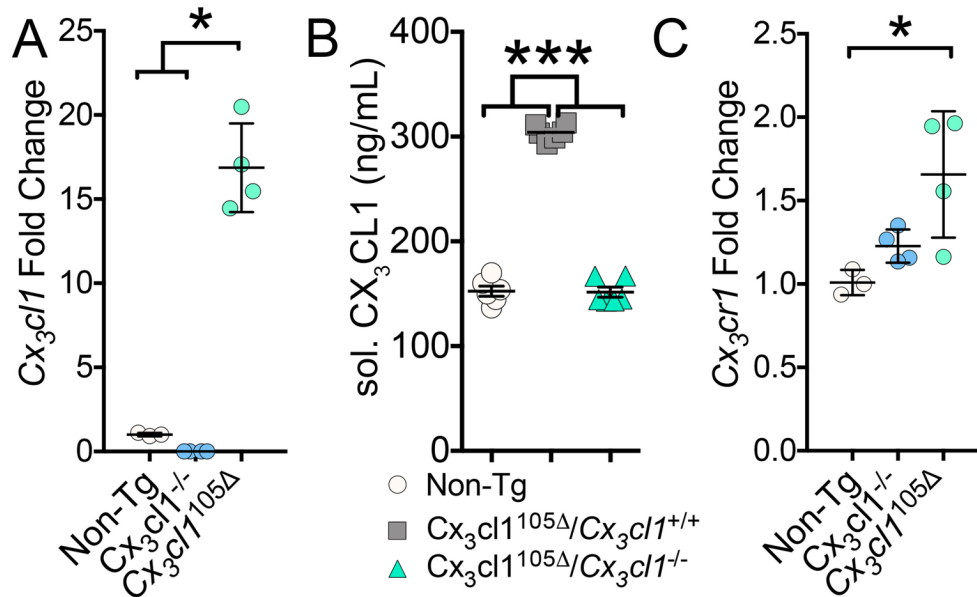

**Additional file 1: Figure S1: Altered *Cx3cl1* and *Cx3cr1* mRNA expression in non-transgenic, *Cx3cl1*<sup>-/-</sup>, *Cx3cl1*<sup>105Δ</sup> mice as well as altered soluble CX<sub>3</sub>CL1 protein levels in non-transgenic, *Cx3cl1*<sup>105Δ</sup>/*Cx3cl1*<sup>+/+</sup> and *Cx3cl1*<sup>105Δ</sup>/*Cx3cl1*<sup>-/-</sup> mice.** (A) Quantitative real-time PCR (qRT-PCR) analysis shows significantly elevated *Cx3cl1* mRNA levels in the brains of *Cx3cl1*<sup>105Δ</sup> mice compared to Non-Tg mice. *Cx3cl1*<sup>-/-</sup> serves as negative control with no fractalkine mRNA expression. (B) ELISA analysis shows significantly elevated levels of soluble (sol.) fractalkine in the *Cx3cl1*<sup>105Δ</sup>/*Cx3cl1*<sup>+/+</sup> mice (which expresses CX<sub>3</sub>CL1<sup>105Δ</sup> along with endogenous CX<sub>3</sub>CL1) compared to non-transgenic *Cx3cl1*<sup>105Δ</sup>/*Cx3cl1*<sup>-/-</sup> (which only expresses CX<sub>3</sub>CL1<sup>105Δ</sup>) mice. (C) qRT-PCR analysis shows significantly elevated mRNA levels for *Cx3cr1* in *Cx3cl1*<sup>105Δ</sup> mice (in *Cx3cl1*<sup>-/-</sup> background) compared to Non-Tg, but not *Cx3cl1*<sup>-/-</sup> mice. Data displayed as mean ± SEM; one-way ANOVA followed by Tukey post-hoc test: \*p < 0.05, \*\*\*p < 0.001; n=3-6 mice per group).
